# Supplementary material for: MetQ of Neisseria gonorrhoeae Is a Surface-Expressed Antigen That Elicits Bactericidal and Functional Blocking Antibodies
Source: PubMed Central journal article supplement (PMC5278169; doi:10.1128/iai.00898-16), 2017-01-26
Supplement: IAI.00898-16_zii999091960s1.pdf [file IAI.00898-16_zii999091960s1.pdf]

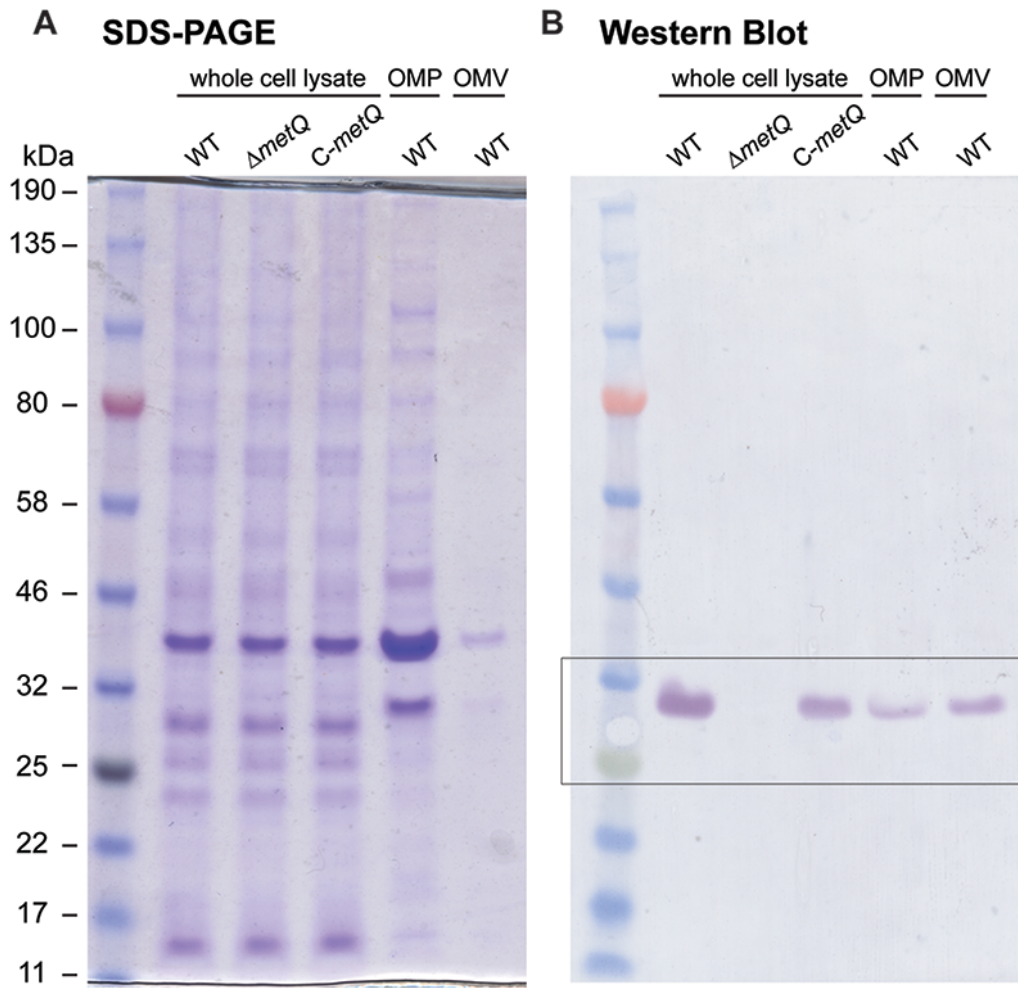

**Figure S1.** (A) Coomassie stained SDS-PAGE gel and (B) Western blot of *N. gonorrhoeae* 1291 wild type (WT), *metQ* knockout ( $\Delta metQ$ ) and complemented (*C-metQ*) strains. Samples analyzed include whole cell lysates, outer membrane protein (OMP) fractions, and outer membrane vesicles (OMV). MetQ is detected in the Western blot using polyclonal anti-MetQ antibodies. The boxed region corresponds to the region of the blot shown in Figure 2A.
